# Supplementary material for: Functional Diversity of TonB-Like Proteins in the Heterocyst-Forming Cyanobacterium Anabaena sp. PCC 7120
Source: PubMed Central journal article supplement (PMC8597729; doi:10.1128/msphere.00214-21), 2021-11-17

WT (1)

I-tonB2 (1)

WT (2)

I-tonB2 (2)

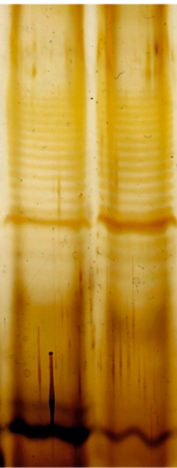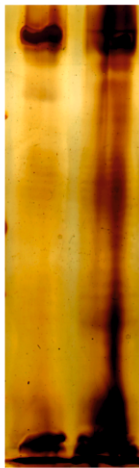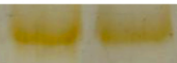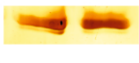

Supplement: msphere.00214-21-sf002.pdf [file msphere.00214-21-sf002.pdf]
