# Supplementary material for: Functional Diversity of TonB-Like Proteins in the Heterocyst-Forming Cyanobacterium Anabaena sp. PCC 7120
Source: PubMed Central journal article supplement (PMC8597729; doi:10.1128/msphere.00214-21), 2021-11-17

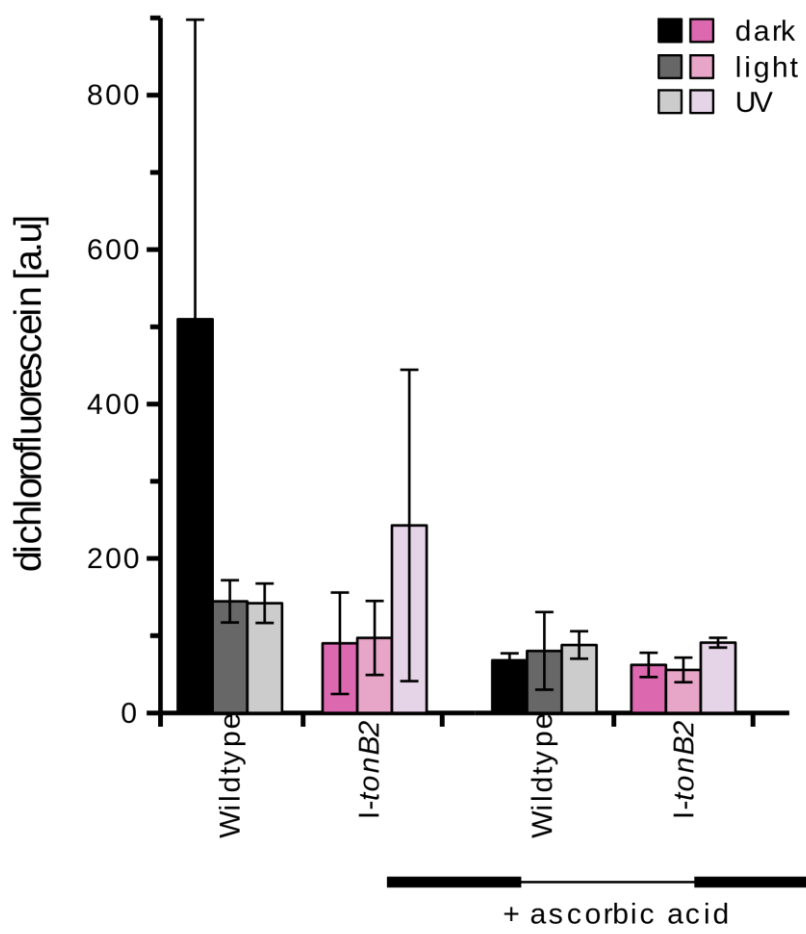

Supplement: msphere.00214-21-sf003.pdf [file msphere.00214-21-sf003.pdf]
