# Supplementary material for: Functional Diversity of TonB-Like Proteins in the Heterocyst-Forming Cyanobacterium Anabaena sp. PCC 7120
Source: PubMed Central journal article supplement (PMC8597729; doi:10.1128/msphere.00214-21), 2021-11-17
Supplement: msphere.00214-21-st002.pdf [file msphere.00214-21-st002.pdf]

**Table S2.** Plasmids used in this study

| Plasmid             | Resistance                       | Insert                            | Purpose                                  | Reference                                                                                                                                                                                                                     |
|---------------------|----------------------------------|-----------------------------------|------------------------------------------|-------------------------------------------------------------------------------------------------------------------------------------------------------------------------------------------------------------------------------|
| pCSV3               | Sp <sup>R</sup> /Sm <sup>R</sup> |                                   | Cloning                                  | Valladares, A., Rodríguez, V., Camargo, S., Martínez-Noël, G. M., Herrero, A., & Luque, I. (2011). <i>Journal of bacteriology</i> , 193(5), 1172–1182.                                                                        |
| pCSEL24             | Sp <sup>R</sup> /Sm <sup>R</sup> |                                   |                                          | Olmedo-Verd, E., Muro-Pastor, A. M., Flores, E., & Herrero, A. (2006). <i>Journal of bacteriology</i> , 188(18), 6694–6699.                                                                                                   |
| pCSEL24-<br>alr0248 | Sp <sup>R</sup> /Sm <sup>R</sup> | Internal fragment of <i>sjdR</i>  | Generation of single-recombinant mutants | Stevanovic, M., Hahn, A., Nicolaisen, K., Mirus, O., & Schleiff, E. (2012). <i>Environmental Microbiology</i> , 14(7), 1655-70.; Schätzle, H., Arévalo, S., Flores, E., & Schleiff, E. (2021). <i>mBio</i> , 12(3), e0048321. |
| pCSV3-<br>all3585   | Sp <sup>R</sup> /Sm <sup>R</sup> | Internal fragment of <i>tonB2</i> |                                          |                                                                                                                                                                                                                               |
| pCSV3-<br>all5036   | Sp <sup>R</sup> /Sm <sup>R</sup> | Internal fragment of <i>tonB3</i> |                                          |                                                                                                                                                                                                                               |
| pCSV3-<br>alr5329   | Sp <sup>R</sup> /Sm <sup>R</sup> | Internal fragment of <i>tonB4</i> |                                          |                                                                                                                                                                                                                               |
