# Supplementary material for: Functional Diversity of TonB-Like Proteins in the Heterocyst-Forming Cyanobacterium Anabaena sp. PCC 7120
Source: PubMed Central journal article supplement (PMC8597729; doi:10.1128/msphere.00214-21), 2021-11-17
Supplement: msphere.00214-21-st003.pdf [file msphere.00214-21-st003.pdf]

**Table S3.** *Anabaena* strains used in this study

| Strain              | Resistance                       | Genotype                 | Reference                                                                                                                                                                                                                     |
|---------------------|----------------------------------|--------------------------|-------------------------------------------------------------------------------------------------------------------------------------------------------------------------------------------------------------------------------|
| WT                  | -                                |                          |                                                                                                                                                                                                                               |
| AFS-I- <i>sjdR</i>  | Sp <sup>R</sup> /Sm <sup>R</sup> | <i>alr0248</i> ::pCSEL24 | Stevanovic, M., Hahn, A., Nicolaisen, K., Mirus, O., & Schleiff, E. (2012). <i>Environmental Microbiology</i> , 14(7), 1655-70.; Schätzle, H., Arévalo, S., Flores, E., & Schleiff, E. (2021). <i>mBio</i> , 12(3), e0048321. |
| AFS-I- <i>tonB2</i> | Sp <sup>R</sup> /Sm <sup>R</sup> | <i>all3585</i> ::pCSV3   |                                                                                                                                                                                                                               |
| AFS-I- <i>tonB3</i> | Sp <sup>R</sup> /Sm <sup>R</sup> | <i>all5036</i> ::pCSV3   |                                                                                                                                                                                                                               |
| AFS-I- <i>tonB4</i> | Sp <sup>R</sup> /Sm <sup>R</sup> | <i>alr5329</i> ::pCSV3   |                                                                                                                                                                                                                               |
